# Supplementary material for: Effects of Benzalkonium Chloride Contents on Structures, Properties, and Ultrafiltration Performances of Chitosan-Based Nanocomposite Membranes
Source: MDPI journal article supplement (doi:10.3390/membranes12030268), 2022-02-25
Supplement: s1 [file s1]

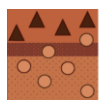

Supplementary Materials

# Effects of Benzalkonium Chloride Contents on Structures, Properties, and Ultrafiltration Performances of Chitosan-Based Nanocomposite Membranes

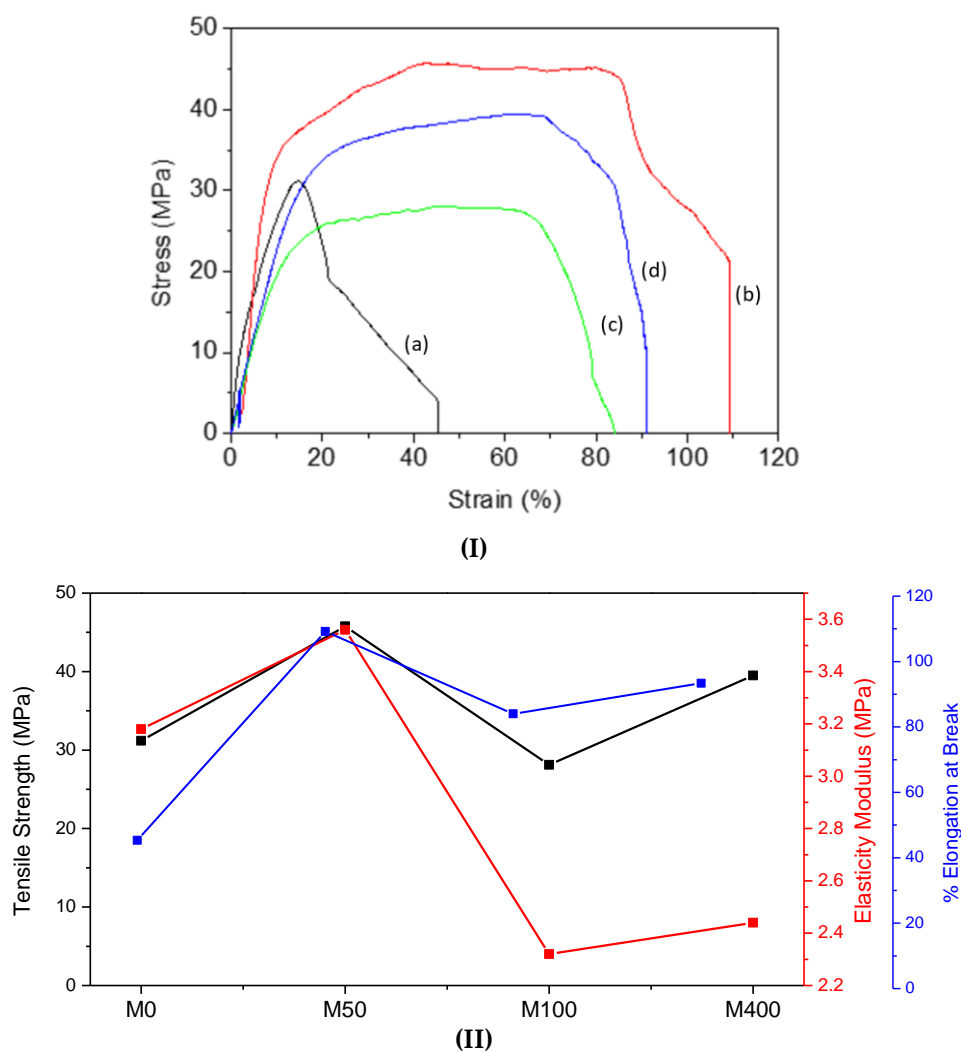

**Figure S1.** (I) Stress vs. strain curves of (a) M0, (b) M50, (c) M100 and (d) M400; (II) Tensile strength, Young's modulus, and elongation at break of nanocomposite membranes.

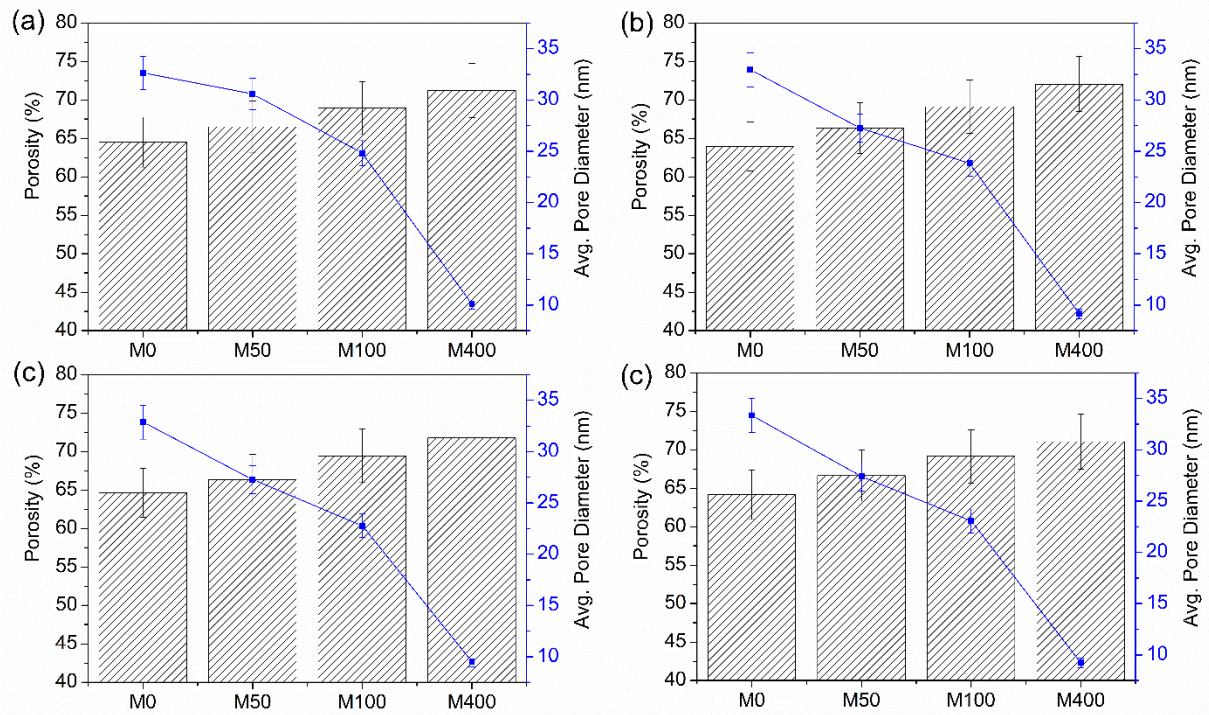

**Figure S2.** Porosity and average pore size of nanocomposite membranes with different BKC contents and thicknesses: (a) 0.05 mm, (b) 0.06 mm, (c) 0.07 mm and (d) 0.08 mm.

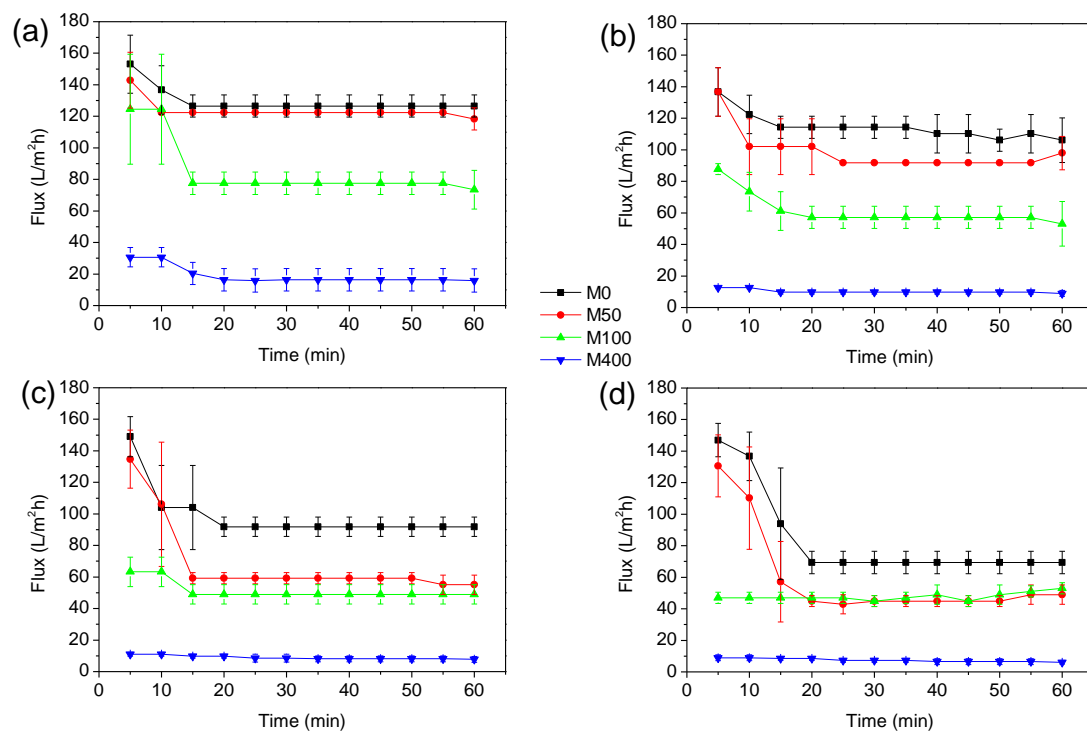

**Figure S3.** Flux-time relationship for various nanocomposite membranes at various thicknesses for the dead-end filtration model: (a) 0.05 mm, (b) 0.06 mm, (c) 0.07 mm and (d) 0.08 mm.

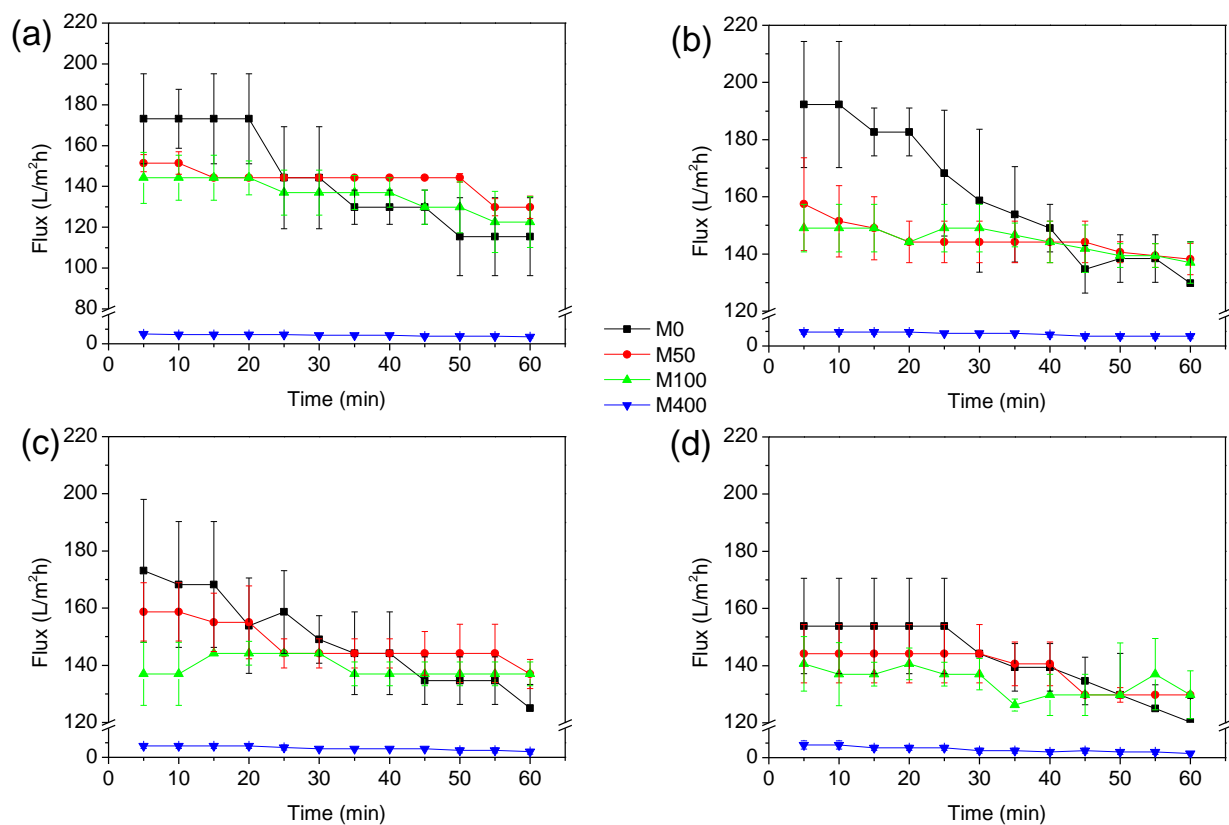

**Figure S4.** Flux-time relationship for various nanocomposite membranes at various thicknesses for the crossflow filtration model: (a) 0.05 mm, (b) 0.06 mm, (c) 0.07 mm and (d) 0.08 mm.

**Table S1.** Comparisons of the performance of similar membranes.

| No. | Precursor      | Pressure (Bar) | Pure Water Flux L/m <sup>2</sup> h | Rejection        | Source                                                                                                                                                                                                                                                                                                                                                 |
|-----|----------------|----------------|------------------------------------|------------------|--------------------------------------------------------------------------------------------------------------------------------------------------------------------------------------------------------------------------------------------------------------------------------------------------------------------------------------------------------|
| 1   | CS/PEG/BKC/CNT | 4              | 129.59                             | 40 (BSA)         | This work                                                                                                                                                                                                                                                                                                                                              |
| 2   | CS/PVA/MMT     | 1              | 25.72                              | 88.34 (Chromium) | Sangeetha, K., Sudha, P. N., & Sukumaran, A. (2019). Novel chitosan based thin sheet nanofiltration membrane for rejection of heavy metal chromium. <i>International journal of biological macromolecules</i> , 132, 939-953.                                                                                                                          |
| 3   | CS/GO          | 4              | 10                                 | 95 (BSA)         | Liu, T., Graham, N., & Yu, W. (2021). Evaluation of a Novel Composite Chitosan–Graphene Oxide Membrane for NOM Removal during Water Treatment. <i>Journal of Environmental Chemical Engineering</i> , 105716.                                                                                                                                          |
| 4   | MWCNT/CS       | 3              | 5.73                               | 65 (NaCl)        | Alshahrani, A. A., Algamdi, M. S., Alsohaimi, I. H., Nghiem, L. D., Tu, K. L., Al-Rawajfeh, A. E., & in het Panhuis, M. (2020). The rejection of mono-and di-valent ions from aquatic environment by MWNT/chitosan buckypaper composite membranes: Influences of chitosan concentrations. <i>Separation and Purification Technology</i> , 234, 116088. |
